# Supplementary material
Source: PubMed Central journal article supplement (PMC5394863)

**Innate lymphoid cells are expanded and functionally altered in chronic lymphocytic leukemia**

---

*Iris de Weerd*<sup>1,2</sup>, *Vera van Hoven*<sup>1</sup>, *J. Marius Munneke*<sup>1</sup>, *Samme Endstra*<sup>1,2</sup>, *Tom Hofland*<sup>1,2</sup>, *Mette D. Hazenberg*<sup>1</sup> and *Arnon P. Kater*<sup>1,3</sup>

<sup>1</sup>Department of Hematology, Academic Medical Center, Amsterdam; <sup>2</sup>Department of Experimental Immunology, Academic Medical Center, Amsterdam; <sup>3</sup>Lymphoma and Myeloma Center Amsterdam, LYMMCARE, Amsterdam, the Netherlands

Correspondence: [a.p.kater@amc.nl](mailto:a.p.kater@amc.nl)  
doi:10.3324/haematol.2016.144725

**Supplementary table: patient characteristics**

| Patient ID | Age           | Sex           | ALC (*10 <sup>9</sup> /L) | IgV <sub>H</sub> mutational status |
|------------|---------------|---------------|---------------------------|------------------------------------|
| 134        | 62            | F             | 53.0                      | M-CLL                              |
| 136        | 72            | M             | 47.6                      | M-CLL                              |
| 477        | 67            | M             | 39.0                      | U-CLL                              |
| 1202       | 55            | F             | 179.3                     | U-CLL                              |
| 1271       | 65            | F             | 59.0                      | M-CLL                              |
| 1394       | 76            | F             | 96.2                      | M-CLL                              |
| 346        | 49            | M             | 67.0                      | U-CLL                              |
| 442        | 67            | F             | 20.2                      | M-CLL                              |
| 1172       | 71            | M             | 38.5                      | M-CLL                              |
| 1455       | 60            | F             | 52.6                      | U-CLL                              |
| 1524       | 76            | F             | 40.2                      | U-CLL                              |
| 218        | 73            | M             | 47.0                      | M-CLL                              |
| 329        | 70            | F             | 17.5                      | M-CLL                              |
| 898        | 75            | M             | 127.6                     | U-CLL                              |
| 1043       | 71            | F             | 18.1                      | M-CLL                              |
| 1233       | 79            | M             | 100.1                     | U-CLL                              |
| 1245       | 60            | M             | 73.1                      | M-CLL                              |
| 468        | 52            | M             | 132.0                     | U-CLL                              |
| 866        | 60            | F             | 36.6                      | M-CLL                              |
| 1057       | 81            | F             | 26.4                      | M-CLL                              |
| 467        | 63            | F             | 21.1                      | U-CLL                              |
|            | <b>Median</b> | <b>Female</b> | <b>Median</b>             | <b>M-CLL</b>                       |
|            | <b>67</b>     | <b>57%</b>    | <b>47.6</b>               | <b>57%</b>                         |

| Control ID | Age           | Sex           | ALC (*10 <sup>9</sup> /L) |
|------------|---------------|---------------|---------------------------|
| B001       | 68            | F             | 5.9                       |
| B002       | 68            | M             | 9.5                       |
| B003       | 73            | M             | 8.0                       |
| B004       | 75            | F             | 5.0                       |
| B015       | 55            | F             | 2.3                       |
| B016       | 70            | M             | 2,1                       |
| B020       | 60            | M             | 4.0                       |
| B024       | 61            | M             | 4.0                       |
|            | <b>Median</b> | <b>Female</b> | <b>Median</b>             |
|            | <b>68</b>     | <b>37.5%</b>  | <b>4.5</b>                |

ALC: absolute leukocyte count.

M-CLL: mutated IgVH genes

U-CLL: unmutated IgVH genes

### **Supplementary Figure 1**

(A) Representative example of the gating strategy for total ILCs, ILC1s, ILC2s, NKp44<sup>-</sup> ILC3s and NKp44<sup>+</sup> ILC3s. (B) Expression of CD69 in total ILCs in CLL patients and age-matched HCs, as shown by geometric mean fluorescence intensity. (C) Subtype distribution of ILCs in M-CLL (n=12) and U-CLL (n=9) patients. (D) PBMCs depleted from T and B lymphocytes were stimulated with PMA/ionomycin for 4 hours. Representative example of the gating strategy for TNF- $\alpha$  and IFN- $\gamma$  production in ILCs. Correlation between the percentage of ILC1s and percentage of ILCs producing TNF- $\alpha$  (E) and IFN- $\gamma$  (F) in CLL patients as measured in Figure 2A.

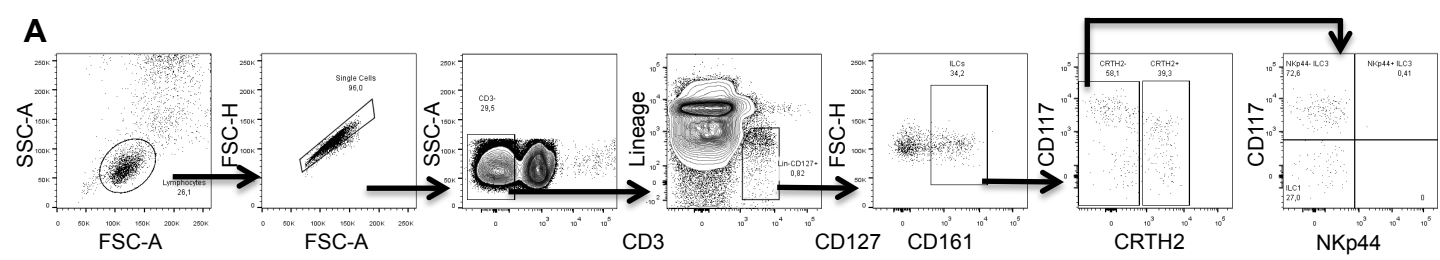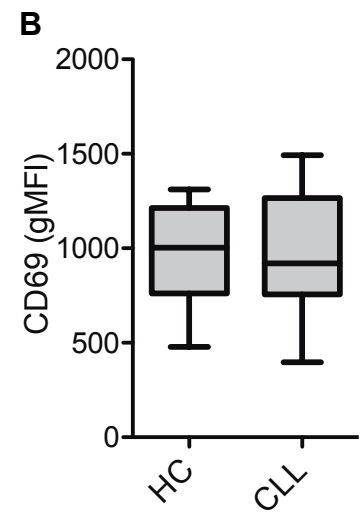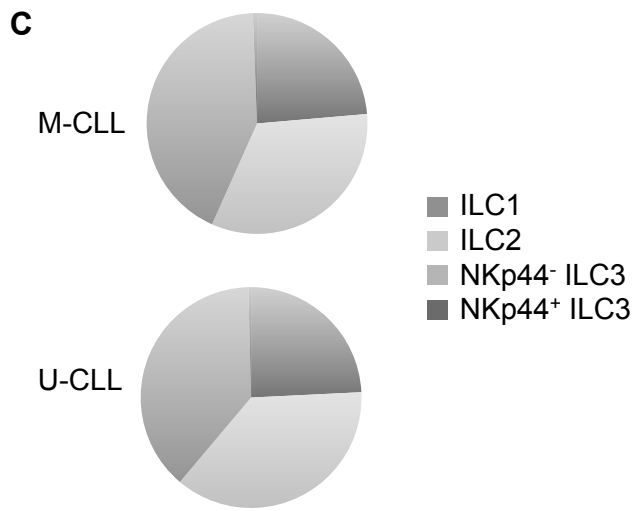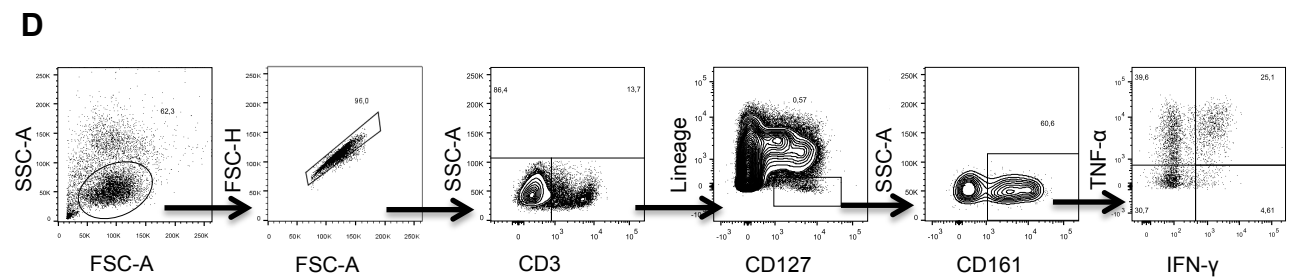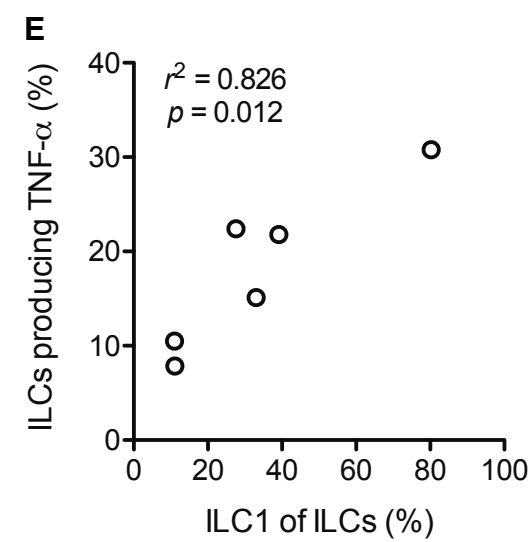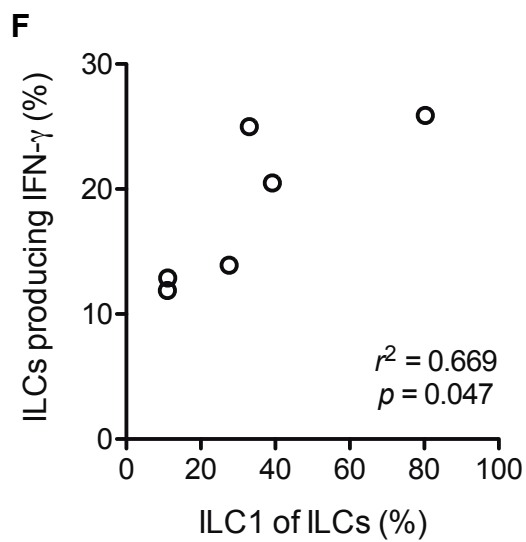

Supplement: 2016.144725.DE_WEERDT_SUPPL.pdf [file 2016.144725.DE_WEERDT_SUPPL.pdf]
