# Supplementary material
Source: PubMed Central journal article supplement (PMC5394863)
Supplement: e903f05339d3565b06cb935e67205656_2016_144725-Disclosures_and_Contributions.pdf [file e903f05339d3565b06cb935e67205656_2016_144725-Disclosures_and_Contributions.pdf]

Haematologica  
HAEMATOL/2016/144725  
Version 4

Innate lymphoid cells are expanded and functionally altered in chronic  
lymphocytic leukemia

Iris de Weerd, Vera van Hoven, J. Marius Munneke, Sanne Endstra,  
Tom Hofland, Mette D. Hazenberg, and Arnon P. Kater

Disclosures: None

Contributions: IdW, VvH, SE, JM and TH performed research. IdW and VvH performed data analysis. IdW and AK wrote the manuscript. MH and AK supervised the study.
